# Supplementary material for: Knowledge, Attitudes, and Practices Regarding Antibiotic Sales in Pharmacies in Medellín, Colombia 2023
Source: MDPI journal article supplement (doi:10.3390/antibiotics12091456), 2023-09-19
Supplement: s1 [file s1]

**Table S1: Multiple comparisons, adjusted with the Bonferroni test**

## Pairwise Comparisons of Zone

| Sample 1-Sample 2                     | Test<br>Statistic | Std.<br>Error | Std. Test<br>Statistic | Sig.  | Adj.<br>Sig. <sup>a</sup> |
|---------------------------------------|-------------------|---------------|------------------------|-------|---------------------------|
| Southeastern zone - Rural districts   | 5.331             | 38.468        | .139                   | .890  | 1.000                     |
| Southeastern zone - Southwestern zone | -27.946           | 18.983        | -1.472                 | .141  | 1.000                     |
| Southeastern zone - Northeastern zone | 42.943            | 20.657        | 2.079                  | .038  | .790                      |
| Southeastern zone - Western-central   | 54.981            | 18.592        | 2.957                  | .003  | .065                      |
| Southeastern zone - Eastern-central   | 56.014            | 18.496        | 3.028                  | .002  | .052                      |
| Southeastern zone - Northwestern zone | 73.231            | 19.845        | 3.690                  | <.001 | .005                      |
| Rural districts - Southwestern zone   | -22.616           | 36.916        | -.613                  | .540  | 1.000                     |
| Rural districts - Northeastern zone   | -37.612           | 37.804        | -.995                  | .320  | 1.000                     |
| Rural districts - Western-central     | -49.650           | 36.717        | -1.352                 | .176  | 1.000                     |
| Rural districts - Eastern-central     | -50.683           | 36.668        | -1.382                 | .167  | 1.000                     |
| Rural districts - Northwestern zone   | -67.900           | 37.367        | -1.817                 | .069  | 1.000                     |
| Southwestern zone - Northeastern zone | 14.996            | 17.599        | .852                   | .394  | 1.000                     |
| Southwestern zone - Western-central   | 27.034            | 15.122        | 1.788                  | .074  | 1.000                     |
| Southwestern zone - Eastern-central   | 28.068            | 15.004        | 1.871                  | .061  | 1.000                     |
| Southwestern zone - Northwestern zone | 45.284            | 16.638        | 2.722                  | .006  | .136                      |
| Northeastern zone - Western-central   | -12.038           | 17.177        | -.701                  | .483  | 1.000                     |
| Northeastern zone - Eastern-central   | -13.071           | 17.073        | -.766                  | .444  | 1.000                     |

|                                                                                                                                                                                          |         |        |        |      |       |
|------------------------------------------------------------------------------------------------------------------------------------------------------------------------------------------|---------|--------|--------|------|-------|
| Northeastern zone -<br>Northwestern zone                                                                                                                                                 | -30.288 | 18.525 | -1.635 | .102 | 1.000 |
| Western-central - Eastern-<br>central                                                                                                                                                    | 1.033   | 14.506 | .071   | .943 | 1.000 |
| Western-central -<br>Northwestern zone                                                                                                                                                   | 18.250  | 16.191 | 1.127  | .260 | 1.000 |
| Eastern-central -<br>Northwestern zone                                                                                                                                                   | 17.217  | 16.080 | 1.071  | .284 | 1.000 |
| Each row tests the null hypothesis that the Sample 1 and Sample 2 distributions are the same.<br>Asymptotic significances (2-sided tests) are displayed. The significance level is .050. |         |        |        |      |       |
| a. Significance values have been adjusted by the Bonferroni correction for multiple tests.                                                                                               |         |        |        |      |       |

### Pairwise Comparisons of Studies

| Sample 1-Sample 2                                                                                                                                                                        | Test<br>Statistic | Std.<br>Error | Std. Test<br>Statistic | Sig.  | Adj.<br>Sig. <sup>a</sup> |
|------------------------------------------------------------------------------------------------------------------------------------------------------------------------------------------|-------------------|---------------|------------------------|-------|---------------------------|
| Pharmacy Assistant -Other                                                                                                                                                                | -27.507           | 15.726        | -1.749                 | .080  | .241                      |
| Pharmacy Assistant -<br>Pharmacy Technician                                                                                                                                              | 42.855            | 10.258        | 4.178                  | <.001 | .000                      |
| Other- Pharmacy<br>Technician                                                                                                                                                            | 15.348            | 16.037        | .957                   | .339  | 1.000                     |
| Each row tests the null hypothesis that the Sample 1 and Sample 2 distributions are the same.<br>Asymptotic significances (2-sided tests) are displayed. The significance level is .050. |                   |               |                        |       |                           |
| a. Significance values have been adjusted by the Bonferroni correction for multiple tests.                                                                                               |                   |               |                        |       |                           |

### Pairwise Comparisons of work experience

| Sample 1-Sample 2                                                                                                                                                                        | Test<br>Statistic | Std.<br>Error | Std. Test<br>Statistic | Sig. | Adj.<br>Sig. <sup>a</sup> |
|------------------------------------------------------------------------------------------------------------------------------------------------------------------------------------------|-------------------|---------------|------------------------|------|---------------------------|
| 2 to 5 years - < 2 years                                                                                                                                                                 | 2.121             | 14.875        | .143                   | .887 | 1.000                     |
| 2 to 5 years - > 5 years                                                                                                                                                                 | -34.808           | 11.911        | -2.922                 | .003 | .010                      |
| < 2 years - > 5 years                                                                                                                                                                    | -32.687           | 12.483        | -2.619                 | .009 | .026                      |
| Each row tests the null hypothesis that the Sample 1 and Sample 2 distributions are the same.<br>Asymptotic significances (2-sided tests) are displayed. The significance level is .050. |                   |               |                        |      |                           |
| a. Significance values have been adjusted by the Bonferroni correction for multiple tests.                                                                                               |                   |               |                        |      |                           |

## S2: Survey

### Survey on the Knowledge, Attitudes, and Practices of Pharmacists Regarding the Use of Antibiotics and Antibiotic Resistance in Medellín.

The data requested in this survey are confidential, and your identity will not be requested at any time. The information obtained here will only be used for research purposes. The results will be published using statistical aggregates. We kindly ask you to respond honestly to the questions we will ask you, and please remember that your responses are anonymous.

Below, you will find some statements. Please rate your level of agreement/disagreement with them on a scale from one to four, like this: **1. Completely disagree, 2. Disagree, 3. Agree, o 4. Completely agree**

|                                                                                      | 1 | 2 | 3 | 4 |
|--------------------------------------------------------------------------------------|---|---|---|---|
| Everyone should take antibiotics every year.                                         |   |   |   |   |
| Antibiotics are used to treat stomach pain and diarrhea.                             |   |   |   |   |
| Patients can stop taking antibiotics when their symptoms improve.                    |   |   |   |   |
| Antibiotics are effective for treating the common cold, cough, and sore throat.      |   |   |   |   |
| Antibiotics are effective for treating Covid-19.                                     |   |   |   |   |
| Fever can be directly reduced with antibiotics.                                      |   |   |   |   |
| An antibiotic will always be effective in treating the same infection in the future. |   |   |   |   |
| There are antibiotics that can be taken without medical prescription.                |   |   |   |   |

Below, you will find some statements. Please rate your level of agreement/disagreement with them on a scale from one to four, like this: **1. Completely disagree, 2. Disagree, 3. Agree, o 4. Completely agree**

|                                                                                                                                        | 1 | 2 | 3 | 4 |
|----------------------------------------------------------------------------------------------------------------------------------------|---|---|---|---|
| Pharmacists should be authorized to prescribe antibiotics for uncomplicated infections.                                                |   |   |   |   |
| The prohibition of selling antibiotics without a medical prescription will decrease pharmacy sales and profits.                        |   |   |   |   |
| According to the medical prescriptions that arrive at your pharmacy, the prescription of antibiotics should be more closely monitored. |   |   |   |   |
| The sale of antibiotics without a medical prescription should be more closely controlled.                                              |   |   |   |   |
| If I refuse to sell antibiotics to a patient who doesn't need them, they could easily obtain them from another pharmacy.               |   |   |   |   |

Below, you will find some statements about certain practices. Please mark according to the frequency with which you perform them, like this: **1. Never, 2. rarely, 3. Almost always, o 4. Always**

|                                                                                                   | 1 | 2 | 3 | 4 |
|---------------------------------------------------------------------------------------------------|---|---|---|---|
| I have been encouraged by the pharmacy to sell antibiotics and receive a commission for each sale |   |   |   |   |
| I recommend antibiotic treatment to patients with COVID-19 symptoms                               |   |   |   |   |

|                                                                                                                                         |  |  |  |  |
|-----------------------------------------------------------------------------------------------------------------------------------------|--|--|--|--|
| I have sold antibiotics without a medical prescription to patients with dental infections (e.g., abscess)                               |  |  |  |  |
| I have sold antibiotics without a medical prescription to adult patients with undiagnosed infections.                                   |  |  |  |  |
| I have sold antibiotics without a medical prescription to patients with upper respiratory tract infections (e.g., otitis, pharyngitis). |  |  |  |  |
| Antibiotics are sometimes dispensed without a medical prescription because the patient has difficulties in obtaining a consultation     |  |  |  |  |
| I have sold antibiotics without a medical prescription to patients with urinary tract infections                                        |  |  |  |  |
| I have sold fewer doses of antibiotics than indicated in the medical prescription at the patient's request.                             |  |  |  |  |
